# Supplementary material for: Genome-wide identification of the tea plant bHLH transcription factor family and discovery of candidate regulators of trichome formation
Source: PubMed Central journal article supplement (PMC8144589; doi:10.1038/s41598-021-90205-7), 2021-05-24
Supplement: 41598_2021_90205_MOESM1_ESM.pdf [file 41598_2021_90205_MOESM1_ESM.pdf]

**Genome-wide identification of the tea plant bHLH  
transcription factor family and discovery of candidate  
regulator of trichome formation  
'Supplemental Information'**

Renjian Liu, Yuyuan Wang, Song Tang, Jiarong Cai, Shaoqun Liu, Peng Zheng, Binmei Sun

March 14th, 2021

# Contents

|                                                                                                                                                                             |          |
|-----------------------------------------------------------------------------------------------------------------------------------------------------------------------------|----------|
| <b>Figure S1.</b> The multiple alignment of CsbHLH conserved domain.                                                                                                        | <b>3</b> |
| <b>Figure S2.</b> Phylogenetic tree of the bHLH family in <i>Camellia sinensis</i> L., <i>Arabidopsis thaliana</i> , <i>Actinidia chinensis</i> and <i>Oryza sativa</i> L.. | <b>4</b> |
| <b>Figure S3.</b> Conserved motifs and gene structure distributions of CsbHLH gene family.                                                                                  | <b>5</b> |
| <b>Figure S4.</b> The expression pattern of CsbHLHs of cluster 1, cluster 3 and cluster 5 in different tissues.                                                             | <b>6</b> |



|          | basic   | helix1  | loop  | helix2 |
|----------|---------|---------|-------|--------|
| CsHL1001 | LPAK    | NLM     | AER   | RRR    |
| CsHL1046 | LPAK    | NLM     | AER   | RRR    |
| CsHL1030 | LPAK    | NLM     | AER   | RRR    |
| CsHL1051 | QPSK    | NLM     | AER   | RRR    |
| CsHL1126 | QPSK    | NLM     | AER   | RRR    |
| CsHL1075 | QPSK    | NLM     | AER   | RRR    |
| CsHL1058 | QPSK    | NLM     | AER   | RRR    |
| CsHL1061 | AASK    | NIV     | SERN  | RRR    |
| CsHL1114 | AASK    | NIV     | SERN  | RRR    |
| CsHL1004 | A-QDH   | VVA     | EKR   | RRR    |
| CsHL1060 | V-QDR   | VMA     | EKR   | RRR    |
| CsHL1017 | SNQD    | HIA     | EKR   | RRR    |
| CsHL1128 | NNQD    | HIA     | EKR   | RRR    |
| CsHL1038 | A-RNH   | ILA     | EKR   | RRR    |
| CsHL1091 | A-ENR   | ILA     | EKR   | RRR    |
| CsHL1054 | A-KNH   | VVA     | EKR   | RRR    |
| CsHL1005 | -PLN    | HVE     | AER   | RRR    |
| CsHL1013 | -PLN    | HVE     | AER   | RRR    |
| CsHL1062 | PPVNH   | VQAE    | RRE   | RRR    |
| CsHL1066 | PPVNH   | VQAE    | RRE   | RRR    |
| CsHL1132 | PPVNH   | VQAE    | RRE   | RRR    |
| CsHL1009 | TPINH   | VQAE    | RRE   | RRR    |
| CsHL1028 | -PLN    | HVE     | AER   | RRR    |
| CsHL1086 | -PLN    | HVE     | AER   | RRR    |
| CsHL1041 | -PLN    | HVE     | AER   | RRR    |
| CsHL1078 | -PLN    | HVE     | AER   | RRR    |
| CsHL1045 | -PLN    | HVE     | AER   | RRR    |
| CsHL1125 | -PLN    | HVE     | AER   | RRR    |
| CsHL1024 | DHETH   | IWT     | ERE   | RRR    |
| CsHL1133 | IYVQ    | CAF     | PEK   | RRR    |
| CsHL1033 | LSANH   | VLA     | EER   | RRR    |
| CsHL1112 | LSANH   | VLA     | EER   | RRR    |
| CsHL1034 | ALKSH   | SEA     | RRR   | RRR    |
| CsHL1129 | ALKSH   | SEA     | RRR   | RRR    |
| CsHL1070 | GRMTH   | I       | AVERN | RRR    |
| CsHL1062 | ASKSH   | SEA     | RRR   | RRR    |
| CsHL1103 | ASKSH   | SEA     | RRR   | RRR    |
| CsHL1099 | ASKSH   | SEA     | RRR   | RRR    |
| CsHL1052 | ASKNH   | KEA     | EKR   | RRR    |
| CsHL1029 | QRMTH   | I       | AVERN | RRR    |
| CsHL1048 | VVG     | -G      | KST   | DR     |
| CsHL1032 | QRMTH   | I       | AVERN | RRR    |
| CsHL1053 | QRMTH   | I       | AVERN | RRR    |
| CsHL1011 | QRMTH   | I       | AVERN | RRR    |
| CsHL1069 | QRMTH   | I       | AVERN | RRR    |
| CsHL1116 | GRMTH   | I       | AVERN | RRR    |
| CsHL1036 | QRMTH   | I       | AVERN | RRR    |
| CsHL1107 | QKVS    | HIT     | VERN  | RRR    |
| CsHL1109 | QKVS    | HIT     | VERN  | RRR    |
| CsHL1096 | QMSH    | I       | AVERN | RRR    |
| CsHL1029 | DHE     | I       | HWT   | ERE    |
| CsHL1089 | DHETH   | I       | WT    | ERE    |
| CsHL1008 | NDRKT   | I       | EKNR  | -RNQ   |
| CsHL1050 | TDRKT   | I       | EKNR  | -RNH   |
| CsHL1064 | LDRKL   | V       | ERNR  | -RIH   |
| CsHL1094 | LDRKT   | V       | ERNR  | -RIH   |
| CsHL1074 | LDRNE   | I       | EKS   | R      |
| CsHL1026 | IYVH    | S       | I     | EKR    |
| CsHL1119 | IMHRD   | I       | ERL   | R      |
| CsHL1027 | INRS    | D       | I     | EKR    |
| CsHL1071 | LQ-HL   | I       | DHNR  | SS     |
| CsHL1121 | LPPH    | T       | DQNR  | SS     |
| CsHL1073 | VAAE    | G       | G     | K      |
| CsHL1084 | VVG     | -G      | K     | S      |
| CsHL1003 | - - - - | V       | K     | S      |
| CsHL1035 | - - - - | K       | H     | C      |
| CsHL1067 | - - - - | I       | N     | E      |
| CsHL1025 | - - - - | K       | A     | R      |
| CsHL1031 | - - - - | K       | A     | R      |
| CsHL1111 | - - - - | K       | A     | R      |
| CsHL1068 | - - - - | K       | A     | R      |
| CsHL1076 | - - - - | K       | A     | R      |
| CsHL1002 | AMDS    | H       | L     | A      |
| CsHL1063 | ATDS    | H       | L     | A      |
| CsHL1019 | ATDS    | H       | L     | A      |
| CsHL1079 | ATDS    | H       | L     | A      |
| CsHL1106 | ATDS    | H       | L     | A      |
| CsHL1130 | ATDS    | H       | L     | A      |
| CsHL1043 | ATDK    | H       | L     | A      |
| CsHL1044 | ATDS    | H       | L     | A      |
| CsHL1007 | ATDS    | H       | L     | A      |
| CsHL1012 | ATDS    | H       | L     | A      |
| CsHL1042 | ATDN    | H       | L     | A      |
| CsHL1101 | ATDS    | H       | L     | A      |
| CsHL1095 | - - - - | A       | R     | E      |
| CsHL1104 | LV      | - - - - | V     | C      |
| CsHL1015 | - - - - | A       | R     | E      |
| CsHL1098 | ATNS    | H       | L     | A      |
| CsHL1127 | ATNS    | H       | L     | A      |
| CsHL1081 | ATNS    | H       | L     | A      |
| CsHL1023 | SKDP    | S       | V     | A      |
| CsHL1118 | SKDP    | S       | V     | A      |
| CsHL1014 | SDDP    | S       | V     | A      |
| CsHL1093 | STDP    | S       | V     | A      |
| CsHL1117 | STDP    | S       | V     | A      |
| CsHL1072 | ATDP    | S       | L     | A      |
| CsHL1105 | ATDP    | S       | L     | A      |
| CsHL1022 | ATHP    | S       | I     | A      |
| CsHL1083 | ATHP    | S       | I     | A      |
| CsHL1115 | ATHP    | S       | I     | A      |
| CsHL1090 | ATHP    | S       | I     | A      |
| CsHL1020 | AAEV    | H       | N     | L      |
| CsHL1134 | AAEA    | H       | N     | L      |
| CsHL1085 | RSSK    | R       | S     | R      |
| CsHL1021 | AAEV    | H       | N     | L      |
| CsHL1131 | AAEV    | H       | N     | L      |
| CsHL1037 | AAVH    | N       | Q     | S      |
| CsHL1097 | AAAN    | H       | N     | Q      |
| CsHL1088 | AAVH    | N       | Q     | S      |
| CsHL1124 | - - - - | Q       | K     | R      |
| CsHL1018 | ATDP    | S       | I     | A      |
| CsHL1122 | ATDP    | S       | I     | A      |
| CsHL1049 | ATDP    | S       | I     | A      |
| CsHL1056 | ATDP    | S       | I     | A      |
| CsHL1077 | KKKS    | H       | S     | E      |
| CsHL1120 | GGGF    | K       | I     | O      |
| CsHL1047 | GRYS    | K       | G     | V      |
| CsHL1102 | ATDS    | H       | L     | A      |
| CsHL1087 | NINS    | H       | S     | O      |
| CsHL1100 | ATDS    | H       | L     | A      |
| CsHL1123 | ATNS    | H       | L     | A      |
| CsHL1092 | ATHP    | S       | I     | A      |
| CsHL1039 | PQSK    | N       | L     | V      |
| CsHL1080 | YQSK    | N       | L     | V      |
| CsHL1108 | SKDP    | S       | V     | A      |
| CsHL1059 | DRS     | R       | T     | L      |
| CsHL1113 | SRO     | R       | A     | T      |
| CsHL1016 | KKL     | N       | H     | N      |
| CsHL1006 | GTT     | K       | H     | C      |
| CsHL1057 | VVMP    | O       | S     | T      |
| CsHL1110 | CL      | S       | A     | O      |
| CsHL1040 | TE      | I       | E     | N      |
| CsHL1082 | RSY     | R       | H     | M      |
| CsHL1055 | VQDC    | N       | E     | T      |

**Figure S1.** The multiple alignment of CsbHLH conserved domain. The conserved amino acids with more than 33% identify are shown in blue. The conservation ratio of them increased with deepening colour.



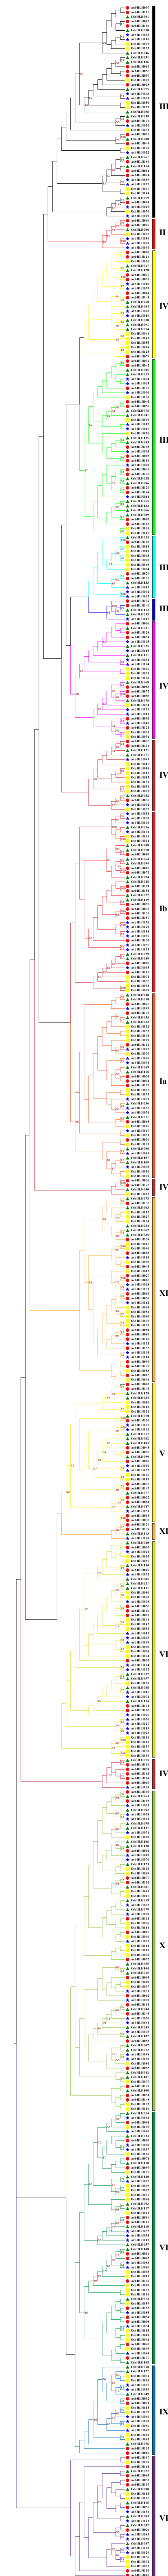

**Figure S2.** Phylogenetic tree of the bHLH family in *Camellia sinensis* L., *Arabidopsis thaliana*, *Actinidia chinensis* and *Oryza sativa* L.. The different-coloured branches indicated different groups of bHLH proteins. Red circle, green triangle, yellow rect and blue star represented bHLH proteins in *Actinidia chinensis*, *Camellia sinensis* L., *Oryza sativa* L. and *Arabidopsis thaliana*, respectively.



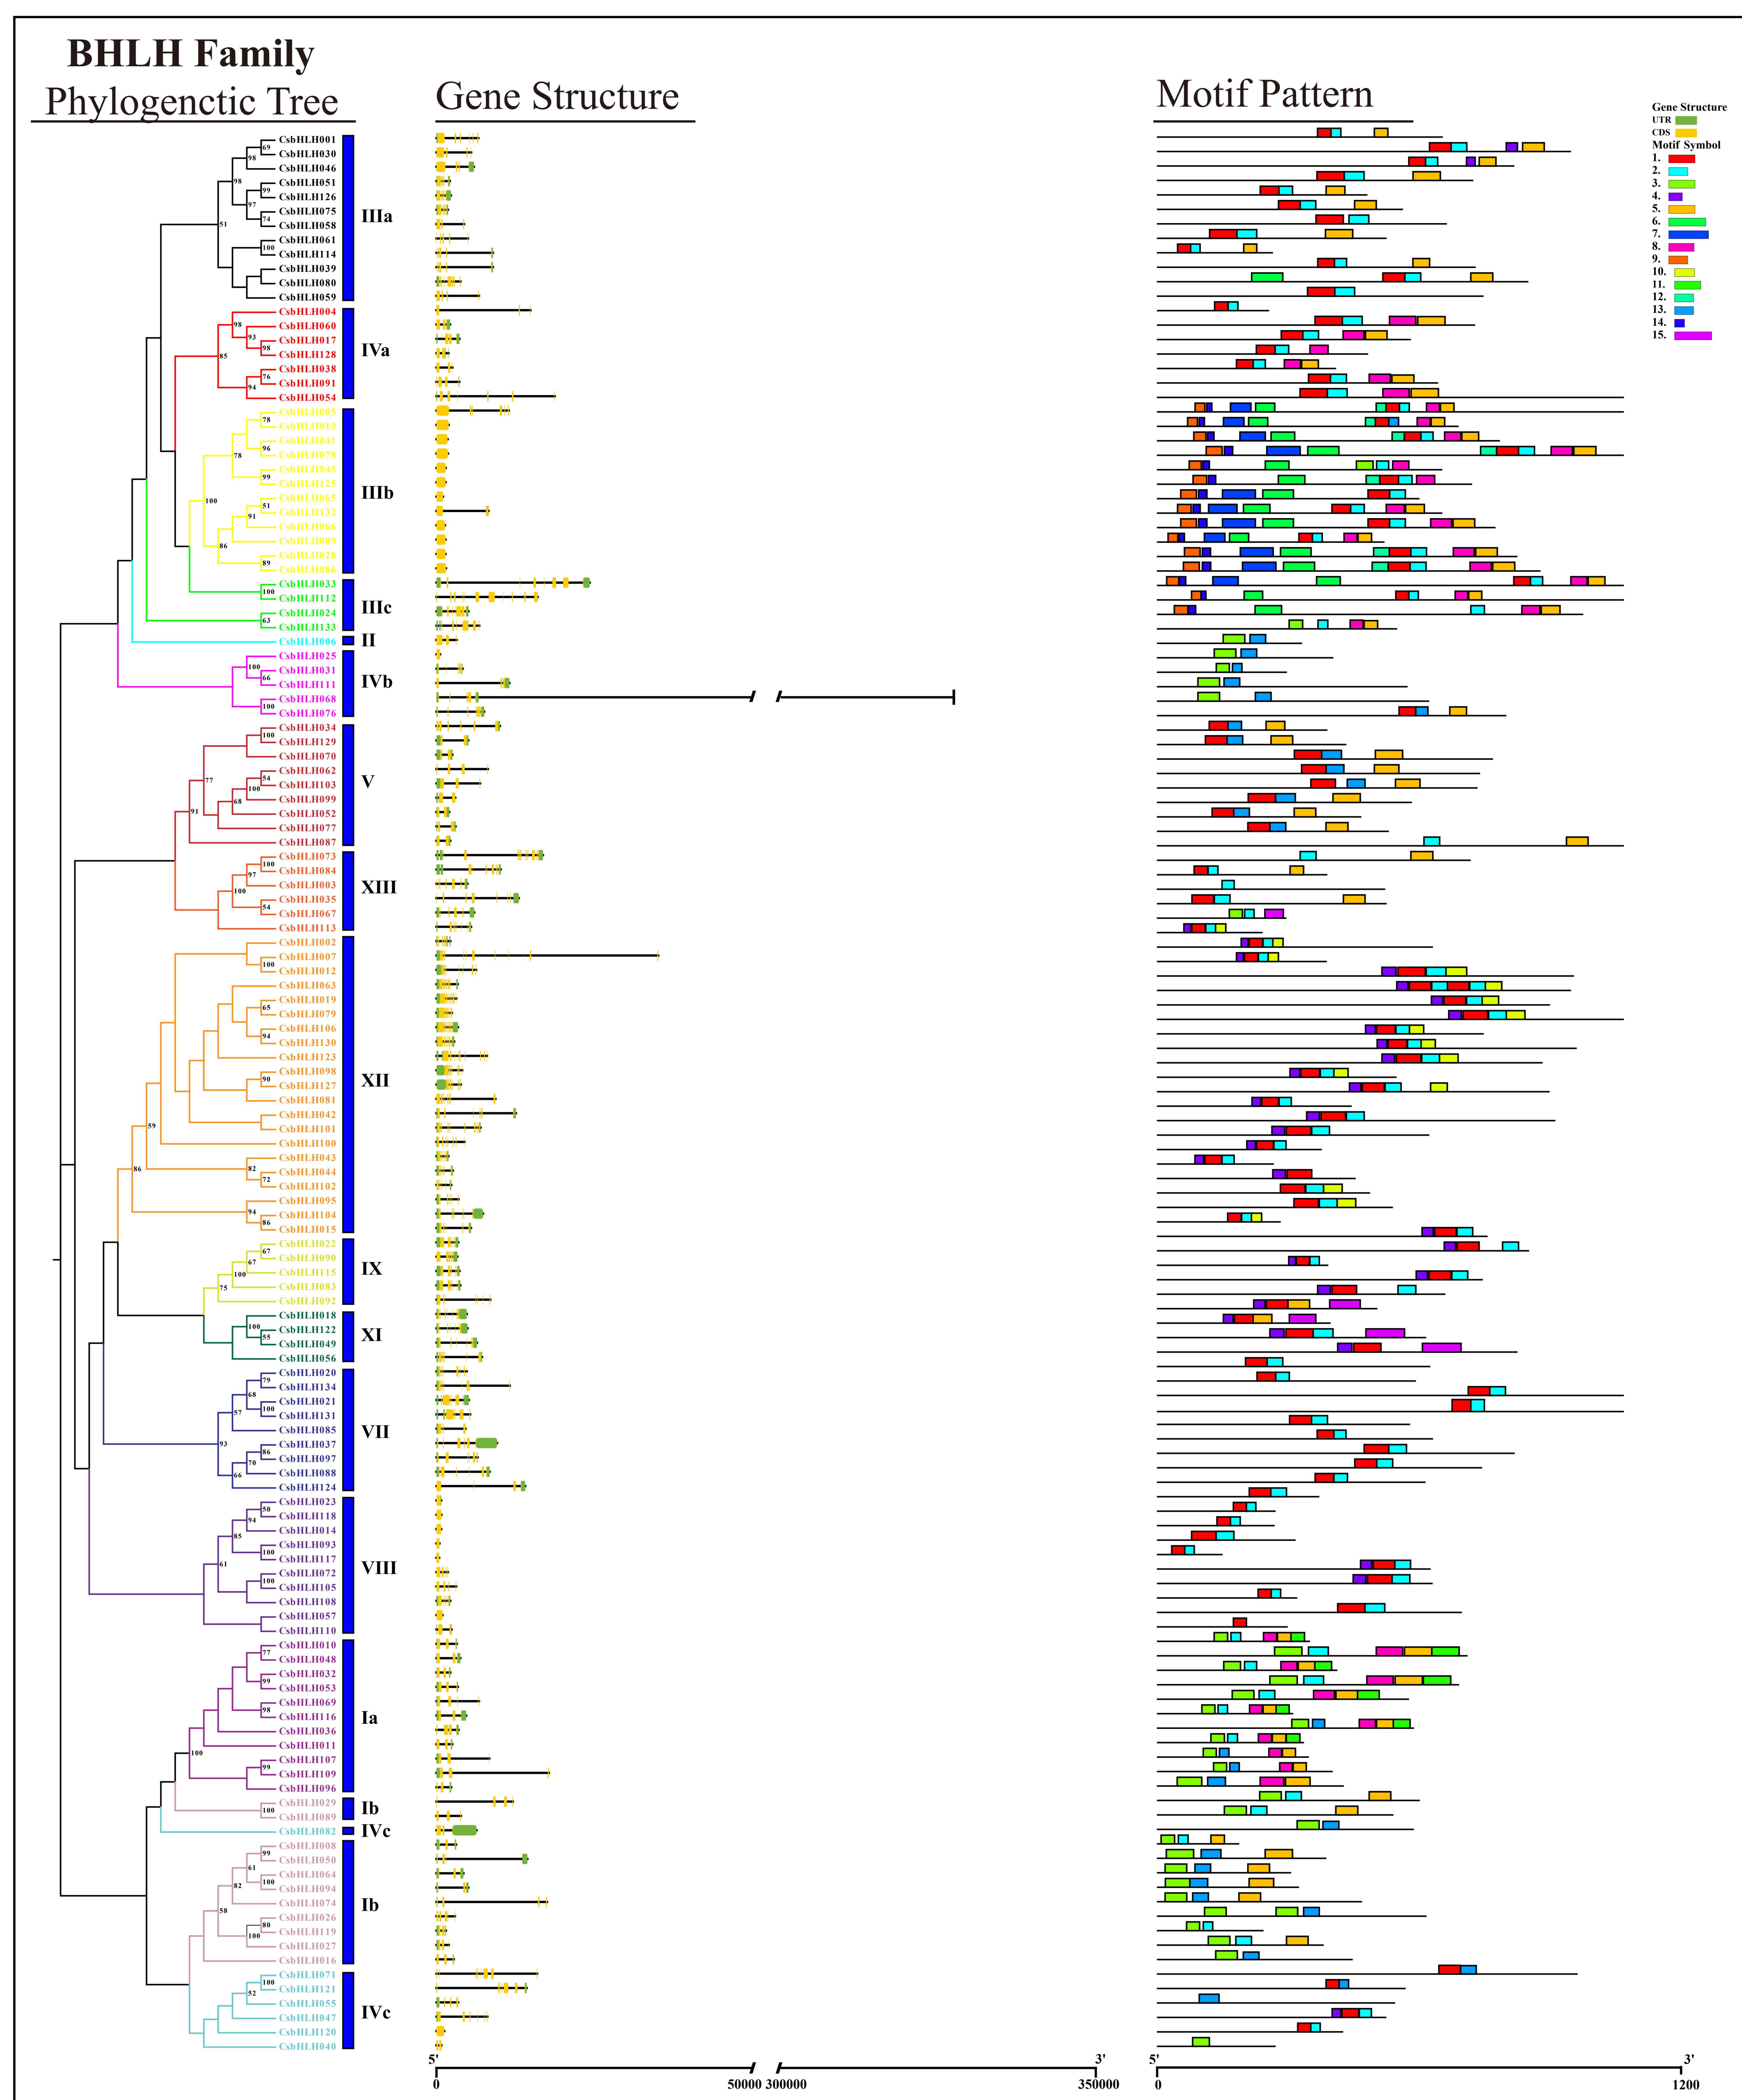

**Figure S3.** Conserved motifs and gene structure distributions of CsbHLH gene family. The phylogenetic tree included all identified CsbHLHs was constructed using Neighbor-joining method. The yellow and green boxes indicated CDS and UTR of *CsbHLHs* (Left). Different coloured boxes represented different motifs (Right).



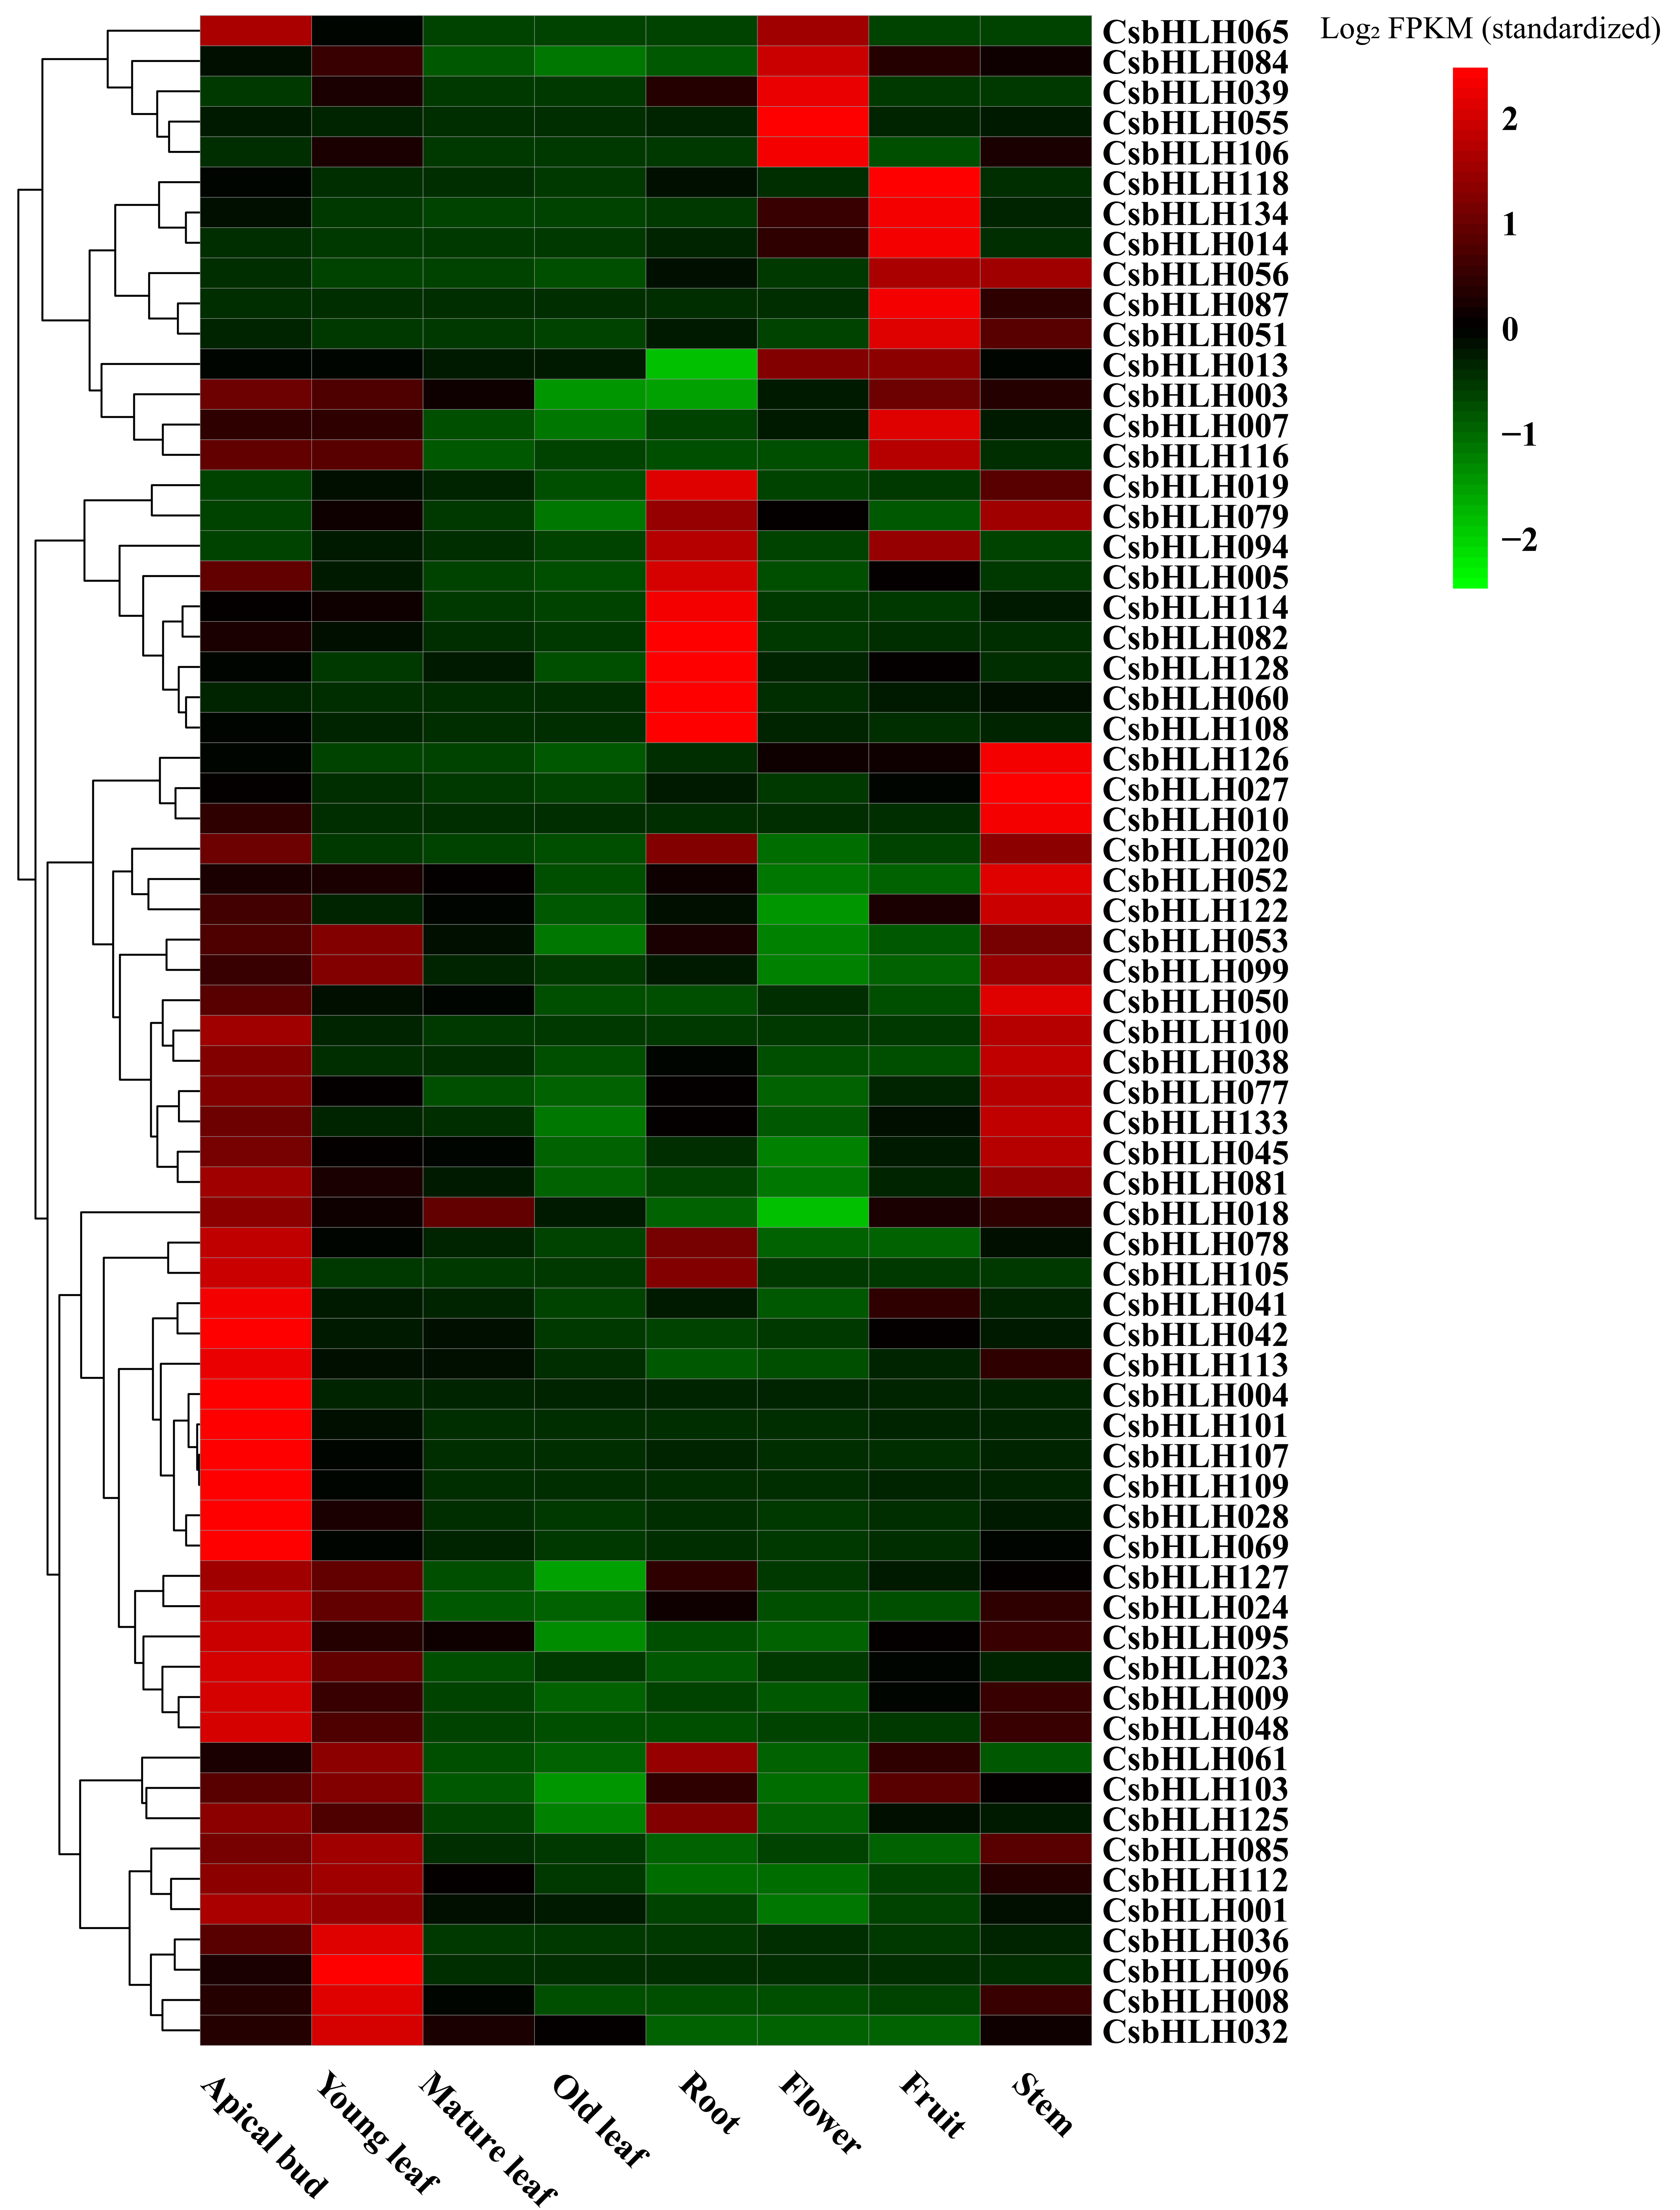

**Figure S4.** The expression pattern of CsbHLHs of cluster 1, cluster 3 and cluster 5 in different tissues. The RPKM values were downloaded from the Tea Plant Information Archive (TPIA) and used to construct the heat map.
